# Supplementary material
Source: PubMed Central journal article supplement (PMC3716270)
Supplement: hdy201327x5.pdf [file hdy201327x5.pdf]

a

| Hotspot     | Primer Name | Sequence (5' to 3')           | Chromosome Location <sup>1</sup> | Fragment Size (bp) | Annealing Temp. (°C) |
|-------------|-------------|-------------------------------|----------------------------------|--------------------|----------------------|
| HLA-F Telo  | 1.1F        | TCT CAT gTC ATC TgC TTC TTg g | 29,790,748                       | 1,941              | 64                   |
|             | 1.1R        | CTC ACA Tgg CTA TTg gAA AAg g | 29,792,689                       |                    |                      |
|             | 1.2F        | gAC CAg ACA ACA Agg AAC TgA g | 29,792,666                       | 3,470              | 64                   |
|             | 1.2R        | TTg gTT gAA TAA CTg ggg TCA g | 29,796,136                       |                    |                      |
|             | 1.3F        | CCT gAC CCC AgT TAT TCA ACC   | 29,796,134                       | 2,623              | 62                   |
|             | 1.3R        | TTC TgC CTC CCA TTC CAT AC    | 29,798,757                       |                    |                      |
| NCR3 - AIF1 | 2.1F        | gCT ggC Tgg ATg TAG TTg Ag    | 31,676,300                       | 2,195              | 62                   |
|             | 2.1R        | TgA TTg gAg Tgg ACA Agg Tg    | 31,678,495                       |                    |                      |
|             | 2.2F        | TCA CCT TgT CCA CTC CAA TC    | 31,678,494                       | 1,922              | 62                   |
|             | 2.2R        | gCC TTC CTT CAT TCT CTC ACC   | 31,680,416                       |                    |                      |
|             | 2.3F        | gAT ggg TAG TgT ggT TTC TgC   | 31,679,635                       | 1,671              | 62                   |
|             | 2.3R        | CCT TTg AgC CTg ggA gTg g     | 31,681,306                       |                    |                      |
| DPA1-Telo   | 3.1F        | TCT Tgg gTA CAT gCT AAC TTC C | 33,128,468                       | 3,108              | 64                   |
|             | 3.1R        | ggA CAg ggC ACA TTC TTA gg    | 33,131,576                       |                    |                      |
|             | 3.2F        | CTg AAT gAA CCC TgC TCT gg    | 33,130,471                       | 2,392              | 62                   |
|             | 3.2R        | TgA ATA ACA AAT ggg CAA ACC   | 33,132,863                       |                    |                      |
|             | 3.3F        | CCT AAg AAT gTg CCC TgT CC    | 33,131,576                       | 2,797              | 62                   |
|             | 3.3R        | gAg CAA Agg gCT gAA gAT TAT g | 33,134,373                       |                    |                      |

<sup>1</sup>Chromosome Location - Coordinates are based on the reference Human Genome Sequence Assembly (NCBI36.1)

b

| Primer Name | Sequence (5' to 3')            | Chromosome Location |
|-------------|--------------------------------|---------------------|
| 1.1F        | TCT CAT gTC ATC TgC TTC TTg g  | 29,790,748          |
| 1.s1        | TCT gAg TAA AAA gTg CCT ggT g  | 29,791,266          |
| 1.s2        | CAC CAg gCA CTT TTT ACT CAg A  | 29,791,284          |
| 1.s3        | CCT ATT gTg TTT TCC ATT CC     | 29,791,689          |
| 1.s4        | gAA TgC CCA CCC AgT AgC        | 29,791,829          |
| 1.s5        | CCT CAA TAC CCA Agg CTC Tg     | 29,792,260          |
| 1.s6        | CAg AgC CTT ggg TAT TgA gg     | 29,792,279          |
| 1.2F        | gAC CAg ACA ACA Agg AAC TgA g  | 29,792,666          |
| 1.s7        | gCC TTT TCC AAT AgC CAT gT     | 29,792,687          |
| 1.1R        | CTC ACA Tgg CTA TTg gAA AAg g  | 29,792,689          |
| 1.s8        | TAC Agg CAT gAg CCA CCA        | 29,793,275          |
| 1.s9        | Tgg Tgg CTC ATg CCT gTA        | 29,793,297          |
| 1.s10       | TgA ATg ACC AAg gTT ACA Cg     | 29,796,114          |
| 1.3F        | CCT gAC CCC AgT TAT TCA ACC    | 29,796,134          |
| 1.2R        | TTg gTT gAA TAA CTg ggg TCA g  | 29,796,136          |
| 1.s11       | CCC TAA ACA gAg AAC CCT CCA    | 29,796,539          |
| 1.s12       | ggC TgC AAg TAA TCC TCC Tg     | 29,796,665          |
| 1.s13       | Tgg ATA ACA gAg ggA gAC CA     | 29,796,880          |
| 1.s14       | gTg ACA gAg Tgg Tgg ggA CT     | 29,797,355          |
| 1.s15       | CAg TCA CAA TgC CCC TCA C      | 29,797,704          |
| 1.s16       | TCA ggg CTA Tgg AAT gAA gg     | 29,797,838          |
| 1.s17       | gTT AgC CAg gAT ggT CTC g      | 29,798,083          |
| 1.s18       | AAA CTg gTC TCT gTC CTA TTT CA | 29,798,392          |
| 1.3R        | TTC TgC CTC CCA TTC CAT AC     | 29,798,757          |

c

| Primer Name | Sequence (5' to 3')           | Chromosome Location |
|-------------|-------------------------------|---------------------|
| 2.1F        | gCT ggC Tgg ATg TAG TTg Ag    | 31,676,300          |
| 2.s1        | TTg AgA CAg AgT TTT gCT gTT g | 31,676,691          |
| 2.s2        | ATC ACg CCA TTg CAC TCC       | 31,676,712          |
| 2.s3        | TgA CCT CgT gAT CCA CCT g     | 31,677,268          |
| 2.s4        | Agg CAg gTg gAT CAC gAg       | 31,677,282          |
| 2.s5        | ggg ATT ACA ggC gTg AgC       | 31,677,300          |
| 2.s6        | CTg TgT TAG CCA gCA Tgg TC    | 31,677,816          |
| 2.s7        | ggg CTg gAg TgC AAT gAC       | 31,677,985          |
| 2.s8        | TCC TTC TAT gTT gCC CAg AC    | 31,678,065          |
| 2.2F        | TCA CCT TgT CCA CTC CAA TC    | 31,678,494          |
| 2.1R        | TgA TTg gAg Tgg ACA Agg Tg    | 31,678,495          |
| 2.s9        | ggg ATg ACA ggA ggC TgA       | 31,678,683          |
| 2.s10       | gAC AgA ATT TTg CTC TTg TTg C | 31,678,725          |
| 2.s11       | Agg Cgg CTT ACC CTg AAT       | 31,679,338          |
| 2.s12       | ggg ATg ACA ggA ggC TgA       | 31,679,400          |
| 2.3F        | gAT ggg TAG TgT ggT TTC TgC   | 31,679,635          |
| 2.s13       | ggA Agg TgC TgC CTg AAT       | 31,679,968          |
| 2.s14       | TTT TTg CgC TCT CAg CTC       | 31,680,018          |
| 2.s15       | Tgg TCT gCC TCT CCg TCT       | 31,680,257          |
| 2.2R        | gCC TTC CTT CAT TCT CTC ACC   | 31,680,416          |
| 2.s16       | TCA CTC TgT CgC CCA gAC       | 31,680,806          |
| 2.s17       | gCA gCA gCg ACA gAA AAg       | 31,680,855          |
| 2.3R        | CCT TTg AgC CTg ggA gTg g     | 31,681,306          |

d

| Primer Name | Sequence (5' to 3')                | Chromosome Location |
|-------------|------------------------------------|---------------------|
| 3.1F        | TCT Tgg gTA CAT gCT AAC TTC C      | 33,128,468          |
| 3.s1        | TgC TCA CAT ACC Agg ACT AAA AC     | 33,128,850          |
| 3.s2        | ggA CAA AAC TgC TTC TAA TTg C      | 33,128,992          |
| 3.s3        | TTC CTT CAT TTC TTA TCT CAT ACT CC | 33,129,086          |
| 3.s4        | CAC CCA ATC gCA TCA ATT TT         | 33,129,555          |
| 3.s5        | Tgg gAT AAT TTg TTT AgC CAg TC     | 33,129,623          |
| 3.s6        | TgT gAg CTg gCA TAA ACT gg         | 33,129,913          |
| 3.s7        | ggg TAA AgA CCC TgC AAC AC         | 33,130,068          |
| 3.2F        | CTg AAT gAA CCC TgC TCT gg         | 33,130,471          |
| 3.s8        | gCA ggT AgC TTC AAA TCA gg         | 33,130,904          |
| 3.s9        | TAT TCC CCg TgA CAg ACC TC         | 33,131,009          |
| 3.s10       | ACC CCA AgT AAA gTC CAT gC         | 33,131,198          |
| 3.1R        | ggA CAg ggC ACA TTC TTA gg         | 33,131,576          |
| 3.3F        | CCT AAg AAT gTg CCC TgT CC         | 33,131,576          |
| 3.s11       | TTC CCC AgA ggT gTT gTT TC         | 33,131,952          |
| 3.s12       | CTC CTg ggg TTC ACT CTT Tg         | 33,132,111          |
| 3.s13       | TTC TAg gAg gCC AAC CAg TC         | 33,132,506          |
| 3.s14       | ggC TTC CAT ATC Cgg TTT TAC        | 33,132,547          |
| 3.s15       | TTT TAC CTT gCC Tgg gTT Tg         | 33,132,849          |
| 3.2R        | TgA ATA ACA AAT ggg CAA ACC        | 33,132,863          |
| 3.s16       | CTC AAA TCT CAT Tgg CTg gAg        | 33,133,216          |
| 3.s17       | CTg TCT gTT TgA Tgg TTg AAg C      | 33,133,328          |
| 3.s18       | AgC AgA gAg ggA AgT gTT gC         | 33,133,448          |
| 3.s19       | ATC CTC CCA TTT gCT CTC TC         | 33,133,603          |
| 3.s20       | AAC ACA CCC CTg CCT gAC            | 33,133,827          |
| 3.s21       | AAA AgC AgA ACC Agg ATT gg         | 33,133,899          |
| 3.3R        | gAg CAA Agg gCT gAA gAT TAT g      | 33,134,373          |
