# Supplementary material
Source: PubMed Central journal article supplement (PMC3716270)
Supplement: hdy201327x6.pdf [file hdy201327x6.pdf]

| a HLA-A |             |                        |
|---------|-------------|------------------------|
| Alleles | Occurrences | Observed Frequency (%) |
| A*01:01 | 5           | 1.06                   |
| A*02:01 | 55          | 11.70                  |
| A*02:03 | 39          | 8.30                   |
| A*02:06 | 19          | 4.04                   |
| A*02:07 | 72          | 15.32                  |
| A*03:01 | 2           | 0.43                   |
| A*11:01 | 117         | 24.89                  |
| A*11:02 | 17          | 3.62                   |
| A*24:02 | 58          | 12.34                  |
| A*24:03 | 1           | 0.21                   |
| A*24:07 | 4           | 0.85                   |
| A*26:01 | 9           | 1.91                   |
| A*29:01 | 2           | 0.43                   |
| A*30:01 | 4           | 0.85                   |
| A*31:01 | 4           | 0.85                   |
| A*32:01 | 1           | 0.21                   |
| A*33:03 | 56          | 11.91                  |
| A*34:01 | 2           | 0.43                   |
| A*68:01 | 1           | 0.21                   |
| others  | 2           | 0.43                   |

| b HLA-B |             |                        |
|---------|-------------|------------------------|
| Alleles | Occurrences | Observed Frequency (%) |
| B*07:05 | 2           | 0.43                   |
| B*13:01 | 25          | 5.32                   |
| B*13:02 | 4           | 0.85                   |
| B*14:01 | 1           | 0.21                   |
| B*15:01 | 11          | 2.34                   |
| B*15:02 | 25          | 5.32                   |
| B*15:11 | 3           | 0.64                   |
| B*15:12 | 1           | 0.21                   |
| B*15:18 | 5           | 1.06                   |
| B*15:21 | 1           | 0.21                   |
| B*15:25 | 1           | 0.21                   |
| B*15:27 | 3           | 0.64                   |
| B*15:58 | 1           | 0.21                   |
| B*18:01 | 1           | 0.21                   |
| B*27:04 | 12          | 2.55                   |
| B*35:01 | 10          | 2.13                   |
| B*35:03 | 4           | 0.85                   |
| B*35:05 | 3           | 0.64                   |
| B*38:01 | 1           | 0.21                   |
| B*38:02 | 28          | 5.96                   |
| B*39:01 | 9           | 1.91                   |
| B*39:05 | 1           | 0.21                   |
| B*39:09 | 1           | 0.21                   |
| B*40:01 | 78          | 16.60                  |
| B*40:02 | 10          | 2.13                   |
| B*40:03 | 1           | 0.21                   |
| B*40:06 | 5           | 1.06                   |
| B*44:03 | 4           | 0.85                   |
| B*46:01 | 91          | 19.36                  |
| B*48:01 | 9           | 1.91                   |
| B*48:03 | 2           | 0.43                   |
| B*50:01 | 1           | 0.21                   |
| B*51:01 | 22          | 4.68                   |
| B*51:02 | 3           | 0.64                   |
| B*51:07 | 1           | 0.21                   |
| B*52:01 | 4           | 0.85                   |
| B*54:01 | 13          | 2.77                   |
| B*55:01 | 1           | 0.21                   |
| B*55:02 | 8           | 1.70                   |
| B*56:01 | 5           | 1.06                   |
| B*56:04 | 4           | 0.85                   |
| B*57:01 | 3           | 0.64                   |
| B*58:01 | 46          | 9.79                   |
| B*67:01 | 1           | 0.21                   |
| B*80:01 | 1           | 0.21                   |
| others  | 4           | 0.85                   |

| c HLA-C |             |                        |
|---------|-------------|------------------------|
| Alleles | Occurrences | Observed Frequency (%) |
| C*01:02 | 112         | 23.83                  |
| C*01:03 | 5           | 1.06                   |
| C*02:02 | 1           | 0.21                   |
| C*03:02 | 46          | 9.79                   |
| C*03:03 | 11          | 2.34                   |
| C*03:04 | 57          | 12.13                  |
| C*04:01 | 20          | 4.26                   |
| C*04:03 | 5           | 1.06                   |
| C*05:01 | 1           | 0.21                   |
| C*06:02 | 7           | 1.49                   |
| C*07:01 | 2           | 0.43                   |
| C*07:02 | 93          | 19.79                  |
| C*07:04 | 1           | 0.21                   |
| C*08:01 | 46          | 9.79                   |
| C*08:02 | 2           | 0.43                   |
| C*12:02 | 15          | 3.19                   |
| C*12:03 | 6           | 1.28                   |
| C*14:02 | 22          | 4.68                   |
| C*14:03 | 1           | 0.21                   |
| C*15:02 | 12          | 2.55                   |
| C*15:04 | 1           | 0.21                   |
| C*15:05 | 1           | 0.21                   |
| C*16:02 | 2           | 0.43                   |
| others  | 1           | 0.21                   |

| d HLA-DRB1 |             |                        |
|------------|-------------|------------------------|
| Alleles    | Occurrences | Observed Frequency (%) |
| DRB1*01:01 | 3           | 0.64                   |
| DRB1*03:01 | 40          | 8.51                   |
| DRB1*03:05 | 1           | 0.21                   |
| DRB1*03:07 | 1           | 0.21                   |
| DRB1*04:03 | 18          | 3.83                   |
| DRB1*04:04 | 2           | 0.43                   |
| DRB1*04:05 | 32          | 6.81                   |
| DRB1*04:06 | 15          | 3.19                   |
| DRB1*07:01 | 13          | 2.77                   |
| DRB1*08:01 | 1           | 0.21                   |
| DRB1*08:02 | 2           | 0.43                   |
| DRB1*08:03 | 44          | 9.36                   |
| DRB1*08:09 | 4           | 0.85                   |
| DRB1*09:01 | 87          | 18.51                  |
| DRB1*10:01 | 1           | 0.21                   |
| DRB1*11:01 | 24          | 5.11                   |
| DRB1*11:04 | 1           | 0.21                   |
| DRB1*11:06 | 1           | 0.21                   |
| DRB1*12:01 | 14          | 2.98                   |
| DRB1*12:02 | 41          | 8.72                   |
| DRB1*13:01 | 3           | 0.64                   |
| DRB1*13:02 | 4           | 0.85                   |
| DRB1*13:12 | 1           | 0.21                   |
| DRB1*14:01 | 12          | 2.55                   |
| DRB1*14:03 | 1           | 0.21                   |
| DRB1*14:04 | 2           | 0.43                   |
| DRB1*14:05 | 8           | 1.70                   |
| DRB1*15:01 | 44          | 9.36                   |
| DRB1*15:02 | 15          | 3.19                   |
| DRB1*15:04 | 1           | 0.21                   |
| DRB1*16:02 | 21          | 4.47                   |
| others     | 13          | 2.77                   |
