# Supplementary material
Source: PubMed Central journal article supplement (PMC3716270)
Supplement: hdy201327x7.pdf [file hdy201327x7.pdf]

a

**HLA-A-C-B**

| Haplotype               | Occurrences | Observed Frequency (%) |
|-------------------------|-------------|------------------------|
| A*02:01-C*07:02-B*40:01 | 7           | 1.49                   |
| A*02:01-C*15:02-B*40:01 | 8           | 1.70                   |
| A*02:03-C*07:02-B*38:02 | 20          | 4.26                   |
| A*02:07-C*01:02-B*46:01 | 60          | 12.77                  |
| A*11:01-C*03:04-B*13:01 | 15          | 3.19                   |
| A*11:01-C*08:01-B*15:02 | 16          | 3.40                   |
| A*11:01-C*07:02-B*40:01 | 19          | 4.04                   |
| A*11:01-C*01:02-B*46:01 | 10          | 2.13                   |
| A*11:02-C*12:02-B*27:04 | 7           | 1.49                   |
| A*24:02-C*03:04-B*40:01 | 7           | 1.49                   |
| A*24:02-C*07:02-B*40:01 | 8           | 1.70                   |
| A*33:03-C*03:02-B*58:01 | 42          | 8.94                   |

b

**HLA-C-B-DRB1**

| Haplotype                  | Occurrences | Observed Frequency (%) |
|----------------------------|-------------|------------------------|
| C*03:04-B*13:01-DRB1*15:01 | 12          | 2.55                   |
| C*03:04-B*13:01-DRB1*16:02 | 7           | 1.49                   |
| C*08:01-B*15:02-DRB1*12:02 | 17          | 3.62                   |
| C*07:02-B*40:01-DRB1*09:01 | 15          | 3.19                   |
| C*01:02-B*46:01-DRB1*08:03 | 13          | 2.77                   |
| C*01:02-B*46:01-DRB1*09:01 | 45          | 9.57                   |
| C*03:02-B*58:01-DRB1*03:01 | 36          | 7.66                   |

c

**HLA-A-C-B-DRB1**

| Haplotype                          | Occurrences | Observed Frequency (%) |
|------------------------------------|-------------|------------------------|
| A*02:03-C*07:02-B*38:02-DRB1*16:02 | 7           | 1.49                   |
| A*02:07-C*01:02-B*46:01-DRB1*08:03 | 8           | 1.70                   |
| A*02:07-C*01:02-B*46:01-DRB1*09:01 | 37          | 7.87                   |
| A*11:01-C*03:04-B*13:01-DRB1*15:01 | 7           | 1.49                   |
| A*11:01-C*08:01-B*15:02-DRB1*12:02 | 12          | 2.55                   |
| A*11:01-C*07:02-B*40:01-DRB1*09:01 | 7           | 1.49                   |
| A*33:03-C*03:02-B*58:01-DRB1*03:01 | 33          | 7.02                   |
