# Supplementary material
Source: PubMed Central journal article supplement (PMC3716270)
Supplement: hdy201327x8.pdf [file hdy201327x8.pdf]

| Region | CHSG-Specific | CEU-Specific | YRI-Specific | CHSG & CEU | CHSG & YRI | CEU & YRI | All |
|--------|---------------|--------------|--------------|------------|------------|-----------|-----|
| HLA-A  | 9             | 10           | 9            | 5          | 3          | 1         | 1   |
| HLA-B  | 12            | 5            | 15           | 1          | 2          | 3         | 4   |
